# Supplementary material for: The hypoxia-inducible factor α pathway couples angiogenesis to osteogenesis during skeletal development
Source: JCI journal article supplement (doi:10.1172/jci31581), 2007-06-01
Supplement: sd1 [file 1]

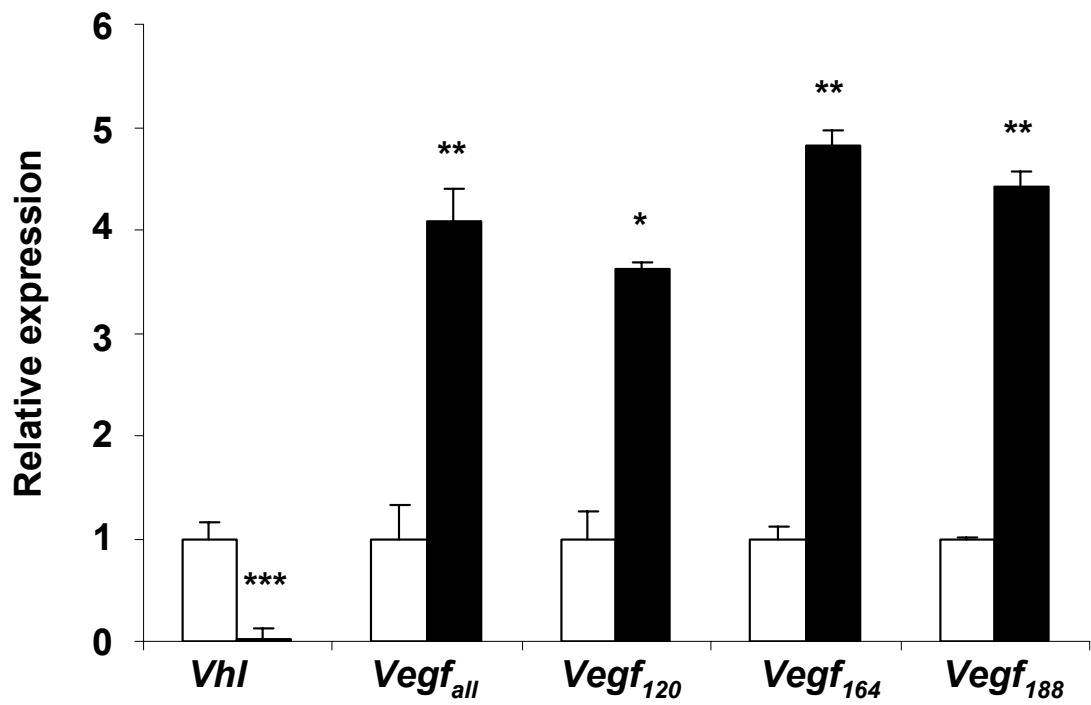

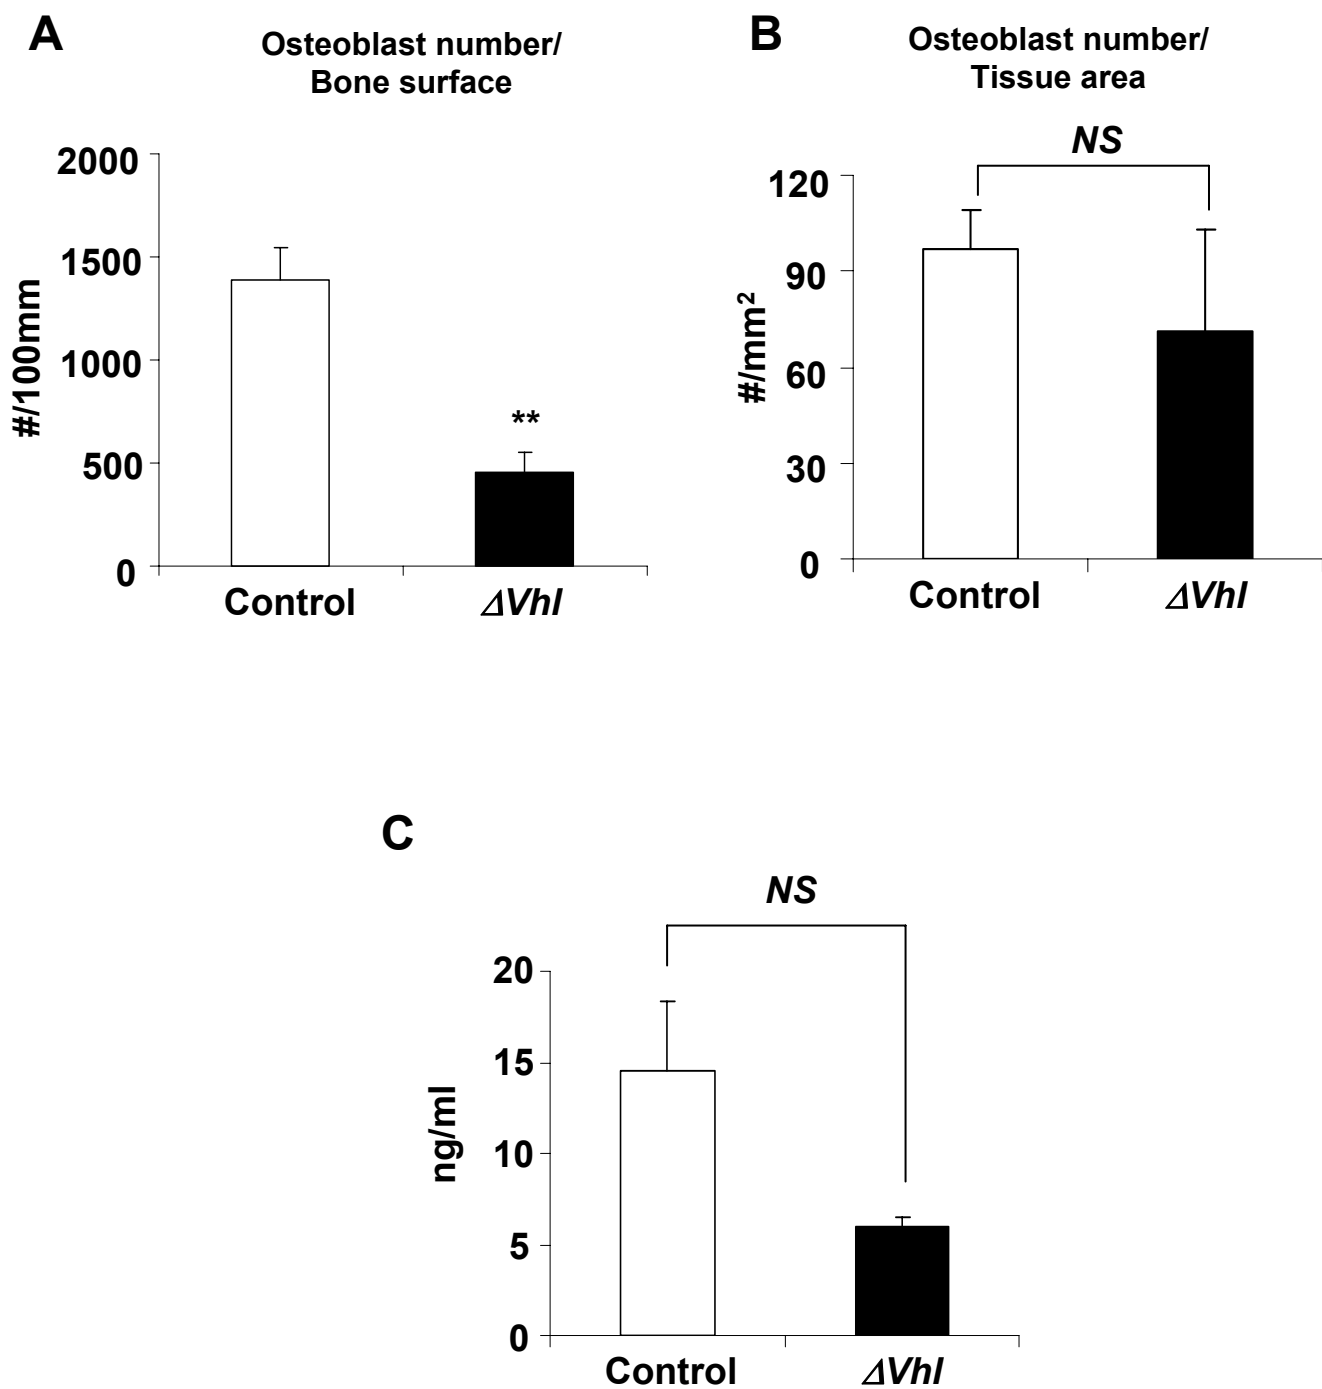

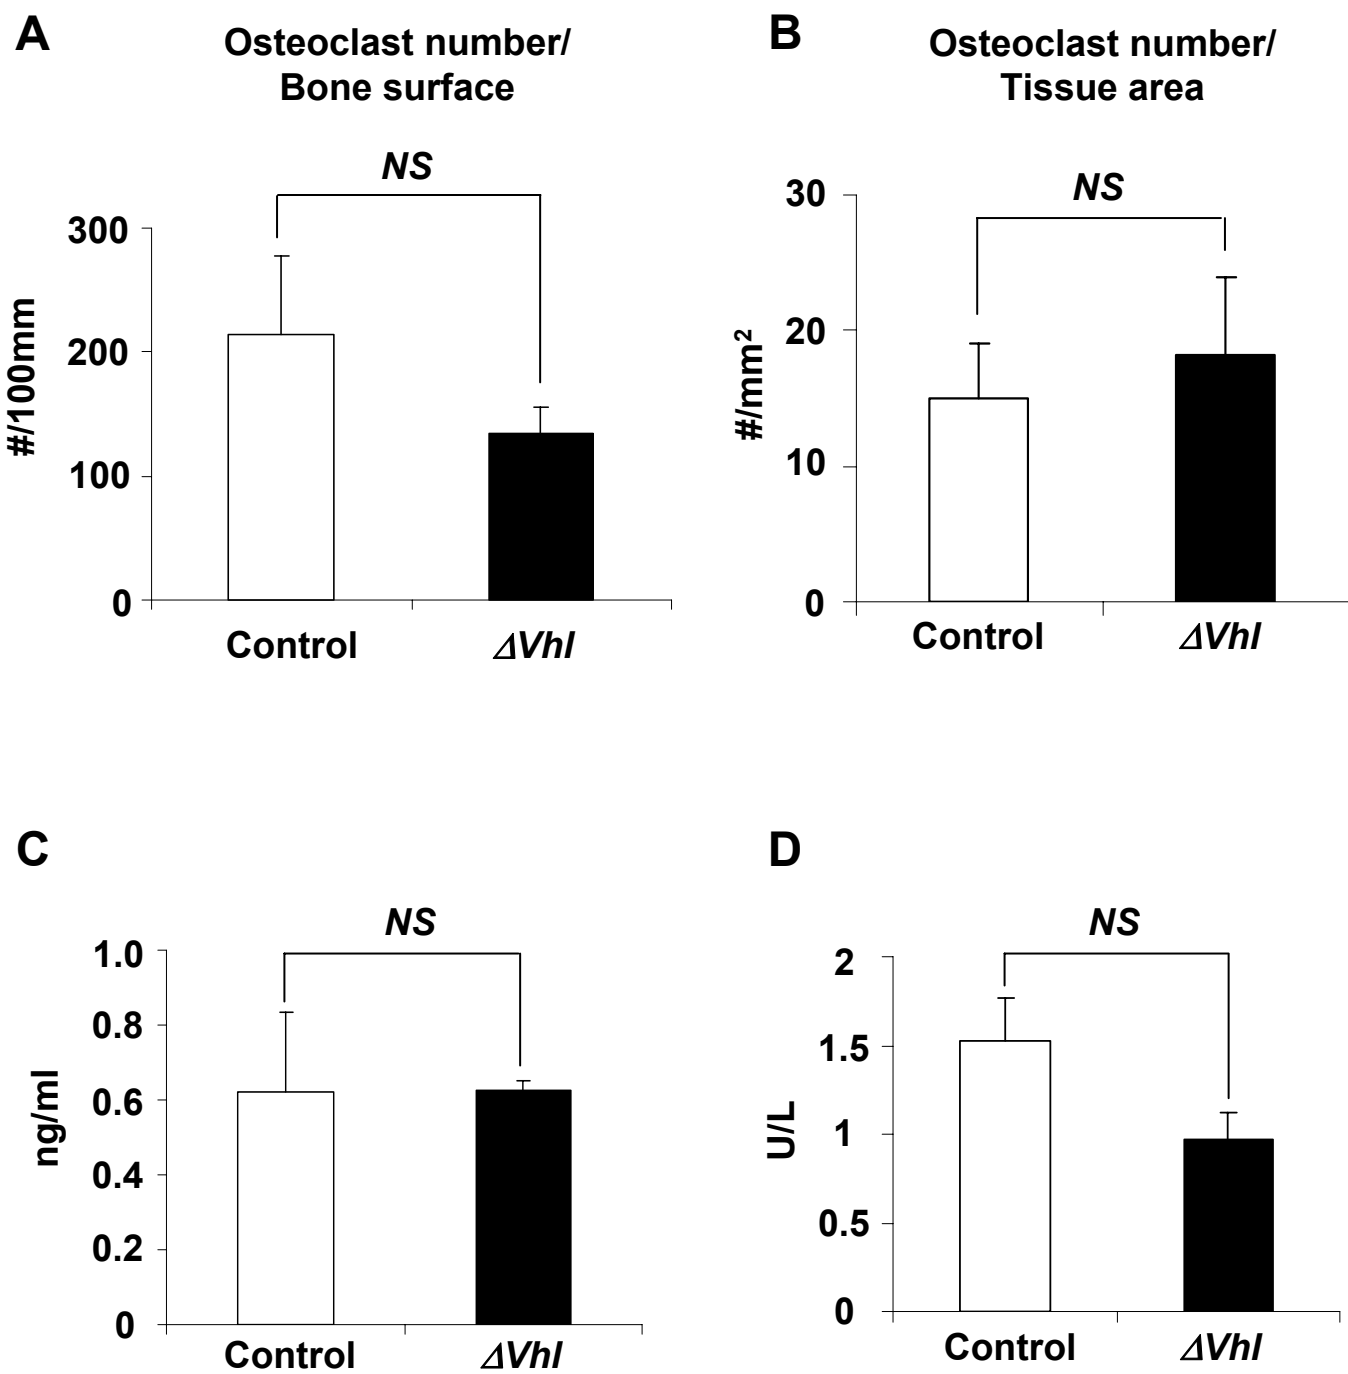

**A**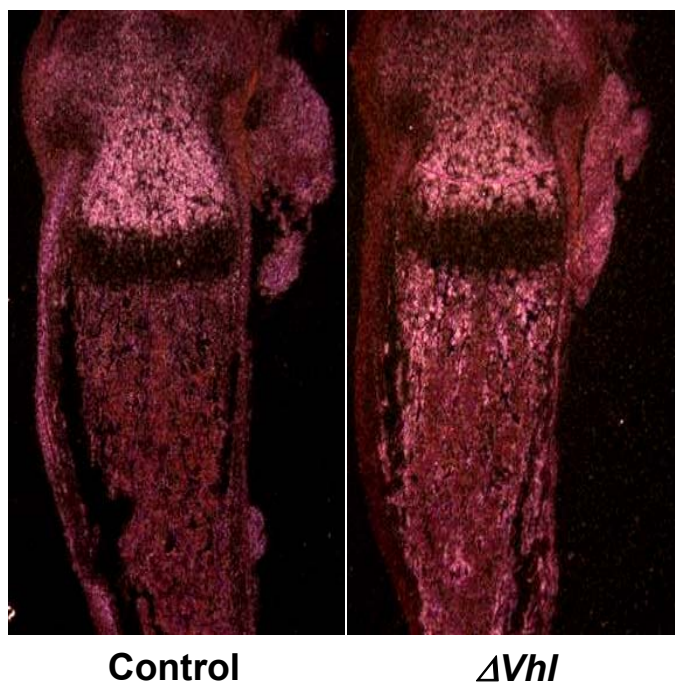**B**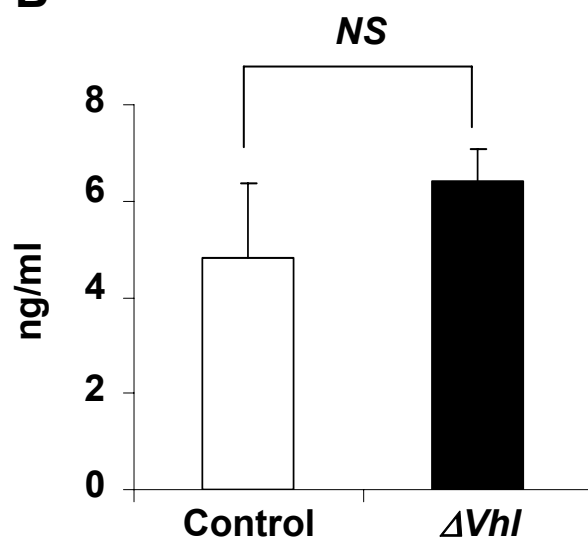

**A**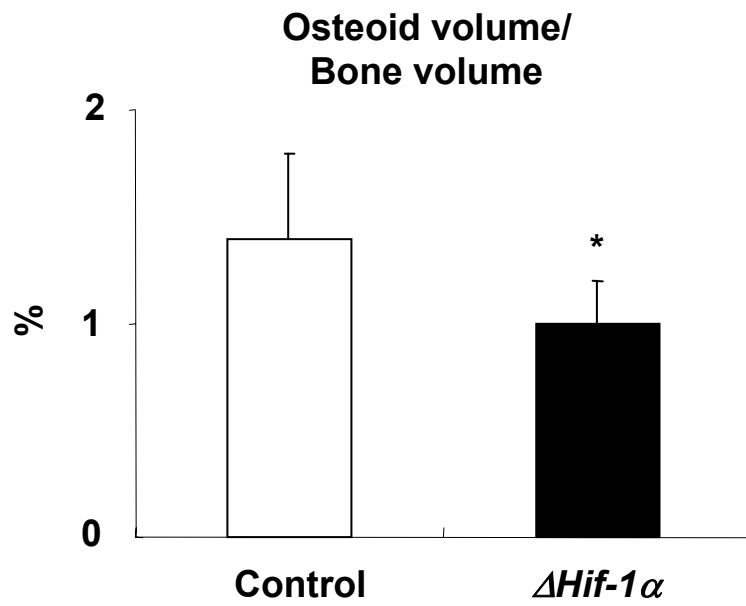**B**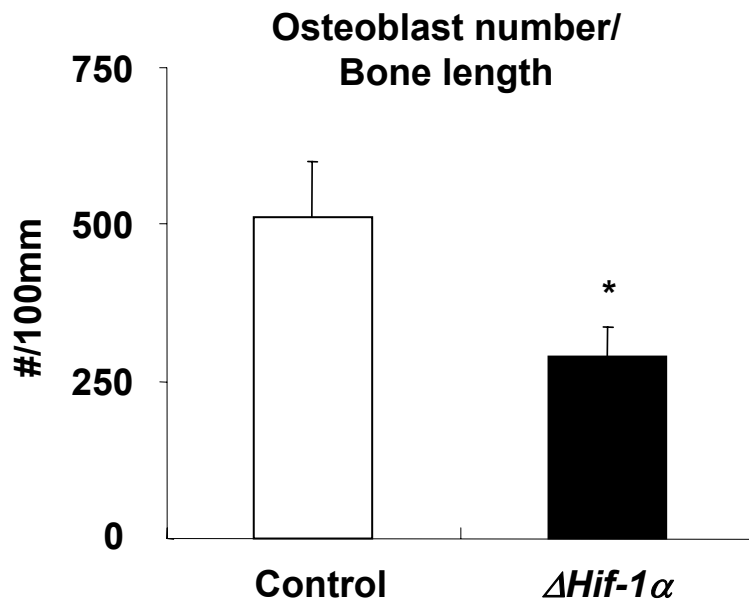

### Supplemental figure 1

*Vhl* deletion in mouse osteoblasts is associated with increased *Vegf* mRNA. Confluent monolayers of *Vhl* floxed primary osteoblasts were infected with either Adeno GFP or Adeno CreM1 (100 MOI) for 48 h. Total mRNA was extracted from confluent monolayers and gene expression of *Vegf<sub>all</sub>*, *Vegf<sub>120</sub>*, *Vegf<sub>164</sub>*, and *Vegf<sub>188</sub>* was determined by quantitative real-time PCR using sequence specific primers. Open bars represent Adeno GFP infection and solid bars represent Adeno CreM1 infection. *Vegf<sub>all</sub>*, all *mVEGF* isoforms. \*,  $P < 0.05$ ; \*\*,  $P < 0.01$ ; \*\*\*,  $P < 0.001$ .

### Supplemental figure 2

Osteoblast numbers and serum osteocalcin in  $\Delta Vhl$  and control mice. **(A and B)** Histomorphometric analyses for osteoblast numbers were performed on femoral sections from  $\Delta Vhl$  mice (solid bars,  $n = 7$ ) and controls (open bars,  $n = 6$ ) at 3 weeks of age as described under “Methods”. **(A)** Osteoblast numbers per trabecular bone surface. **(B)** Osteoblast numbers per tissue area. Data represent mean  $\pm$  SE. \*,  $P < 0.05$ . **(C)** Serum levels of osteocalcin were measured in control and  $\Delta Vhl$  mice at 6 weeks of age by ELISA, as described under “Methods”. Data represent mean  $\pm$  SE.  $n = 3$ . NS, not significant.

### Supplemental figure 3

Osteoclast numbers and serum TRAP5b in  $\Delta Vhl$  and control mice. **(A and B)** Histomorphometric analyses for osteoclast numbers on femoral sections from  $\Delta Vhl$  mice (solid bars,  $n = 7$ ) and controls (open bars,  $n = 6$ ) at 3 weeks of age as described under “Methods”. **(A)** Osteoclast numbers per trabecular bone surface. **(B)** Osteoclast numbers per tissue area. Data represent mean  $\pm$  SE. NS, not significant. **(C and D)**

Serum levels of OPG and TRAP 5b were measured in control and  $\Delta Vhl$  mice at 6 weeks of age by ELISA, as described under “Methods”. Data represent mean  $\pm$  SE.  $n = 3$ . *NS*, not significant.

#### **Supplemental figure 4**

Elevated *Pgk* mRNA expression and un-changed circulating VEGF level in  $\Delta Vhl$  mice.

(A) *In situ* hybridization analysis with *Pgk* mRNA on histological sections from 3-day-old control and *Vhl* mutant femurs was performed as described under “Methods”.

Magnification,  $\times 40$ . (B) Serum levels of VEGF were measured in control and  $\Delta Vhl$  mice at 12 weeks of age by ELISA, as described under “Methods”. Data represent mean  $\pm$  SE.  $n = 5$ . *NS*, not significant.

#### **Supplemental figure 5**

Decreased bone volume and osteoblast numbers in mice lacking *Hif-1 $\alpha$*  in osteoblasts.

Histomorphometric analyses were performed on femoral sections from  $\Delta Hif-1\alpha$  mice and controls at 3 weeks of age as described under “Methods”. Comparison of osteoid volume (A) and osteoblast numbers (B) between control (open bars,  $n = 6$ ) and  $\Delta Hif-1\alpha$  mice (solid bars,  $n = 6$ ) are shown. Data represent mean  $\pm$  SE. \*,  $P < 0.05$ .
